# Supplementary material for: Bumble Bees (Bombus terrestris) Use Time-Memory to Associate Reward with Color and Time of Day
Source: Insects. 2023 Aug 14;14(8):707. doi: 10.3390/insects14080707 (PMC10455649; doi:10.3390/insects14080707)
Supplement: Supplementary file 1 [file insects-14-00707-s001.zip › Individual choices table.xlsx]

## Sheet: PreMorning
SAMPLE		FLOWER COLOR						TIME
TAG	BEE NUMBER	YELLOW (count)			BLUE (count)
GREEN	8							6.30-7.00
	11
	22	*3			1
	28
	35	*6			5
	37	*5
	38
	46
	53
	58
	60
	74
	86
ORANGE	54
	58
	79
	81	*2
	83	*7			3
	87
	89
	96
	12	*5			3
	52	*4			2
	73	*2			1
	untagged	*2
GREEN	8							7.00-7.30
	11
	22	*4			1
	28
	35	*3
	37	*5			1
	38
	46	3			1
	53				*1
	58
	60	3			*3
	74	*10			7
	86
ORANGE	54
	58	*2			1
	79
	81	*7			1
	83	5			5
	87	*7
	89
	97	*1
	73	*5			2
	untagged	*2
	81	1
	12	1			*1
	72	*1
	18	*1
	52				*2
The colored boxes with * represents the first color choice of that bee.

## Sheet: Morning
SAMPLE		FLOWER COLOR						TIME
TAG	BEE NUMBER	YELLOW (count)			BLUE (count)
GREEN	8							7.30-8.00
	11
	22	*13			2
	28
	35	*2			2
	37	*18			4
	38
	46	*5			1
	53	2
	58	*3
	60	2			2
	74	*11			1
	84	*5
	53	*7			2
	86
ORANGE	54
	58	*3			2
	79	1			1
	81	*5			1
	83	*4			1
	87	*2			1
	89	*6			1
	12	*1			*1
	18	*2
	52	*1			1
	untagged	1
	53	*7			2
	93	*1
	94	1
	97	*3			2
GREEN	8							8.00-8.30
	11
	22	13			1
	28
	35	*4
	37	4			7
	38
	46	*1
	53	9			4
	58
	60	*4			4
	74	*3			2
	84	*5
	48	4			*5
	86
ORANGE	54
	58	4			5
	79	3			2
	81	4			1
	83	2			1
	87	1			*3
	89	5			*1
	18	1			1
	52	*3			1
	12	1			*3
	73	*2
	68	*8			7
	97	1			4

## Sheet: PostMorning
SAMPLE		FLOWER COLOR						TIME
TAG	BEE NUMBER	YELLOW (count)			BLUE (count)
GREEN	8							8.30-9.00
	11
	22	1			*6
	28
	35	1			*4
	37	7			*10
	38
	46	2			*1
	53	3			*5
	58
	60	3			*5
	74	1			*5
	48				*1
	86	1			*4
ORANGE	62				*1
	58				*1
	79	2			6
	81				*1
	83	1			*4
	87				*2
	89	1			3
	73	*4			2
	12	*4			*2
	18	*4			5
	68				1
	97
GREEN	80				*1			9.00-9.30
	11
	22	1			*2
	28
	35	*1			1
	37	4			*2
	38
	46	*1			1
	53	2			*2
	58				*4
	60	1			*5
	74	*2			3
	86	2
ORANGE	untagged	*2			2
	80				*1
	79
	81				*2
	73	*1			2
	87				*4
	89
	58	1			*1
	18	*2			1

## Sheet: Midday
	11.00-11.30
	Bee number	Yellow	Blue
Green	80	2	*5
	46		*2
	79		*1
Orange	87	1	1
	24	1	*7
	13.00-13.30
	Bee number	Yellow	Blue
Green	60		*1
	37	1
Orange	73		*1
	83		*1
	15.00-15.30
	Bee number	Yellow	Blue
Green	60	1
	22	1
Orange	89	2	1
	unagged	2
	83	1

## Sheet: PreEvening
SAMPLE		FLOWER COLOR						TIME
TAG	BEE NUMBER	YELLOW (count)			BLUE (count)
GREEN	8							16.30-17.00
	11
	22	5			*7
	32	1
	35	5			6
	37
	38
	46	1			*12
	53	*2			*5
	58
	60	3			*11
	74	*1			7
	86
ORANGE	12	*5
	83				*1
	79	1			*3
	73				*4
	83				*2
	87				*4
	89	4			*3
	97				*1
GREEN	8							17.00-17.30
	11
	22	1			*5
	28
	35	2			*8
	37
	38
	46	1			*3
	53
	58
	60	1			*12
	74	1			*10
	86
ORANGE	12	2			*3
	58	*2			3
	79				*3
	81				*1
	83				*3
	87				*2
	89	3			*9
	18	2			*3
	65				*3
	73	*1
	97				*3

## Sheet: Evening
SAMPLE		FLOWER COLOR						TIME
TAG	BEE NUMBER	YELLOW (count)			BLUE (count)
GREEN	8							17.30-18.00
	11
	22				*8
	28
	35				*4
	37
	38
	46				*8
	53	*4			1
	58				*6
	60				*5
	74	1			*10
	86
ORANGE	52				*1
	58				*5
	79				*10
	12				*3
	83				*5
	87				*4
	89	1			*3
	96				*4
GREEN	8							18.00-18.30
	11
	22				*5
	28
	35				*7
	37
	38
	46				*2
	53				*2
	58
	60
	74				*2
	86
ORANGE	65				*2
	58	1			*4
	73				*1
	81	1			*3
	83	1			*5
	87				*3
	89	1			*1
	96

## Sheet: PostEvening
SAMPLE		FLOWER COLOR						TIME
TAG	BEE NUMBER	YELLOW (count)			BLUE (count)
GREEN	8							18.30-19.00
	11
	22				*1
	28
	35
	37
	38
	46
	53
	58				*3
	60
	74				*3
	86
ORANGE	64	1			*2
	65				*2
	79	1			*2
	81	1			*4
	83	3			*2
	87	1			*2
	89	1			2
	73	5			*4
	12				*3
	97	1			*1
GREEN	8							19.00-19.30
	11
	22
	28
	35
	37
	38
	46
	53
	58
	60				*2
	74
	86
ORANGE	49	*1
	58				*3
	79
	81
	83
	87	*3			2
	untagged	*3
	96
